# Supplementary figures and images for: Comparison of Different Label-Free Techniques for the Semi-Absolute Quantification of Protein Abundance
Source: MDPI journal article supplement (doi:10.3390/proteomes10010002), 2022-01-07

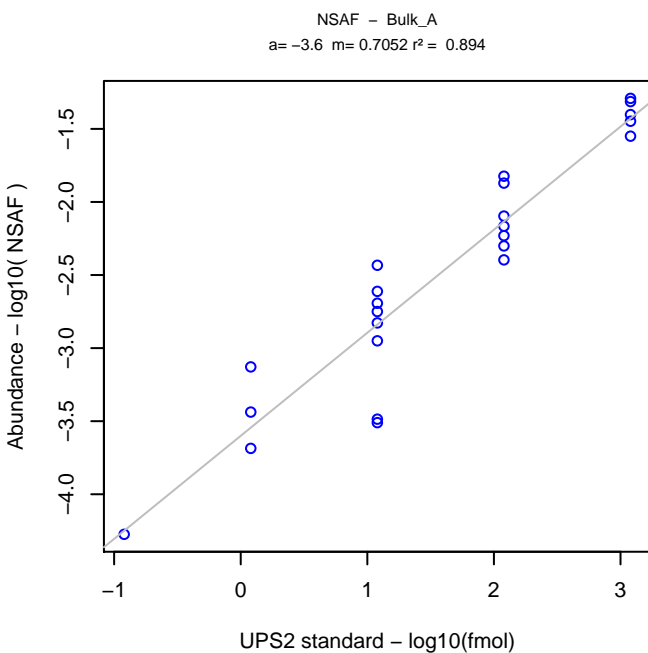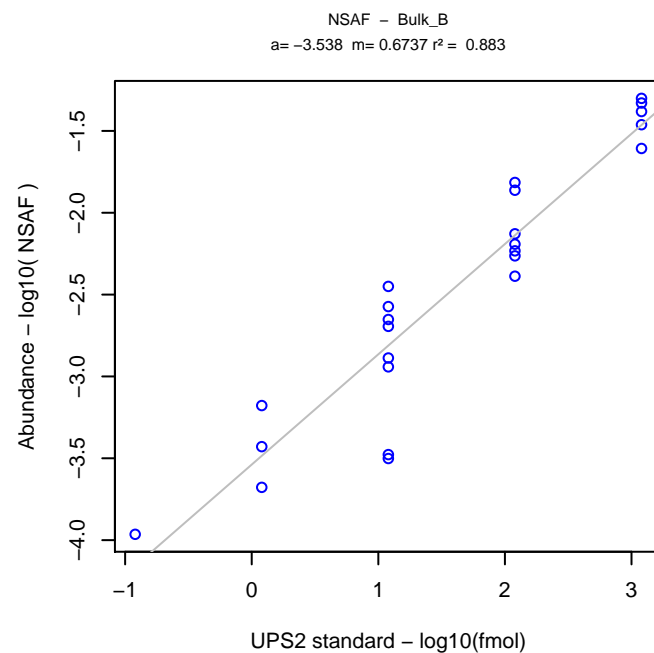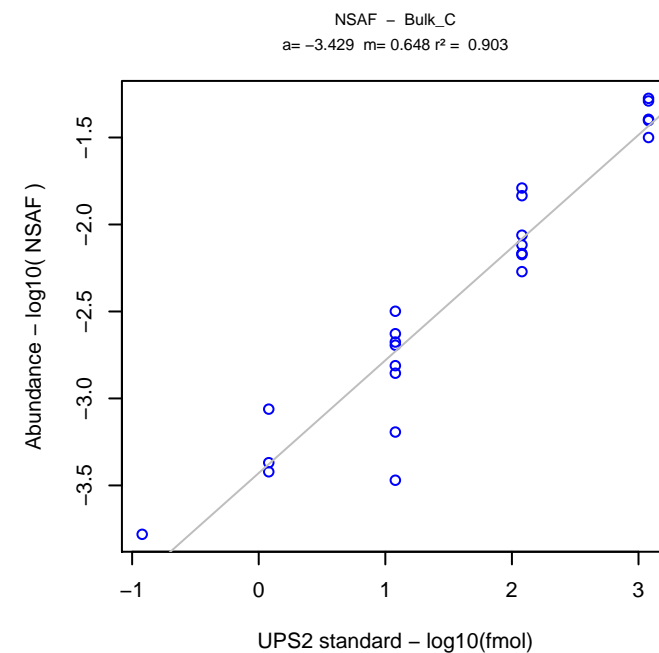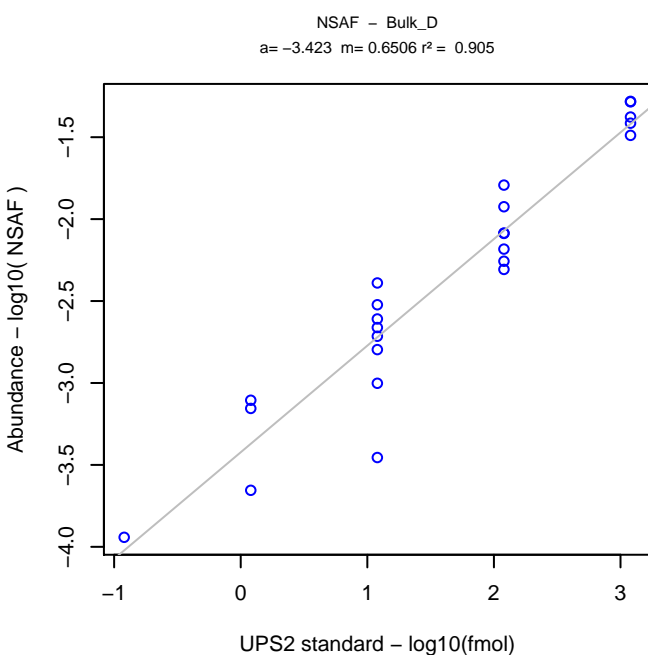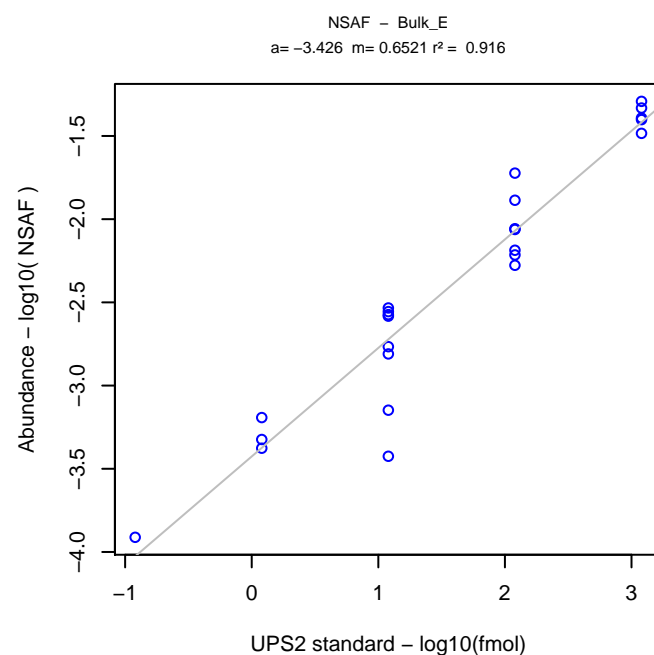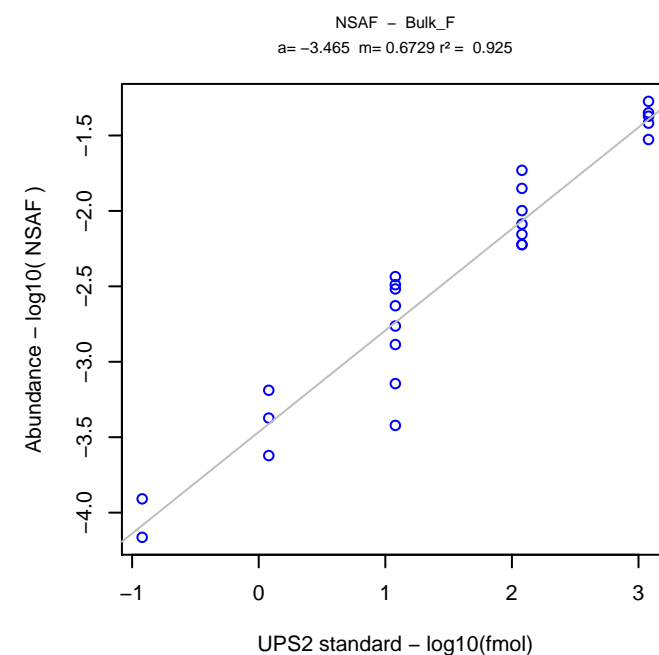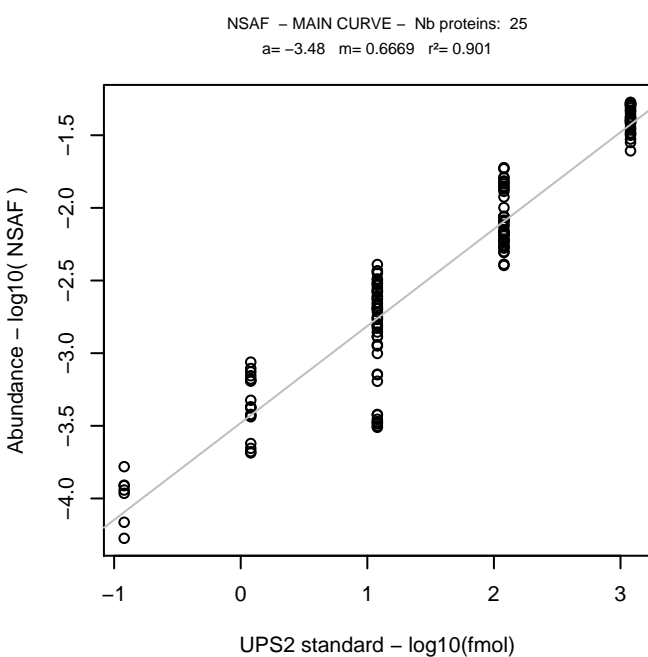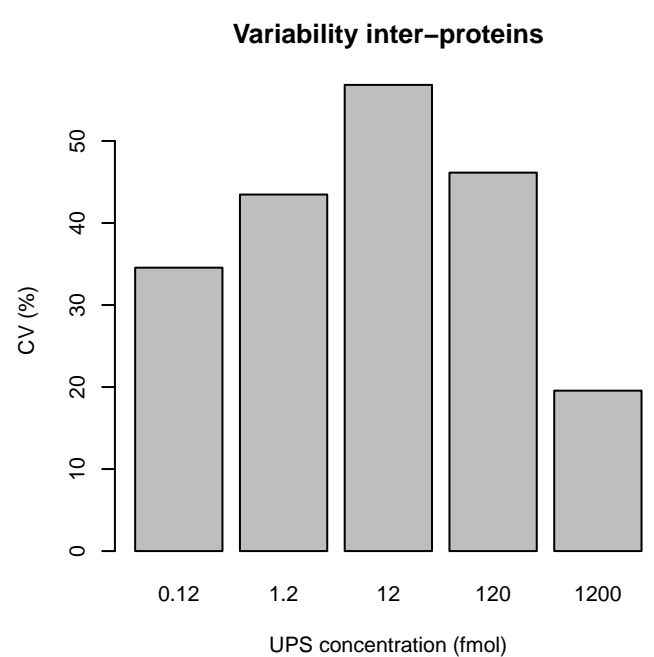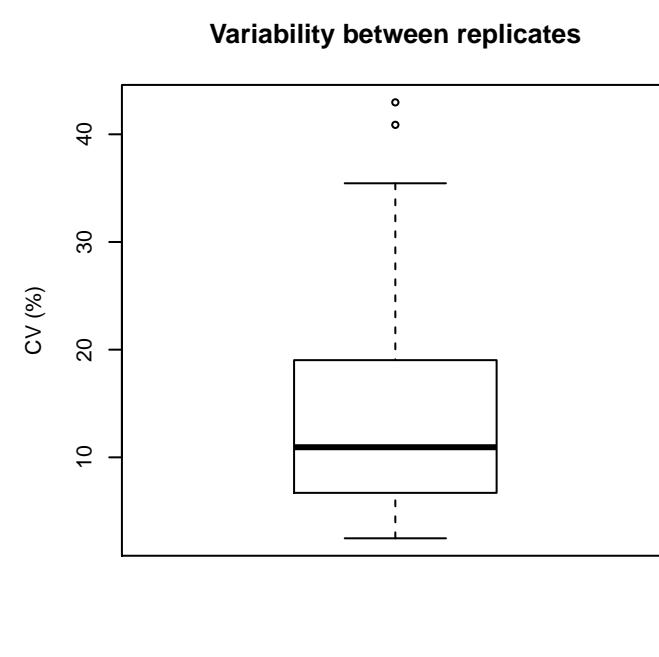

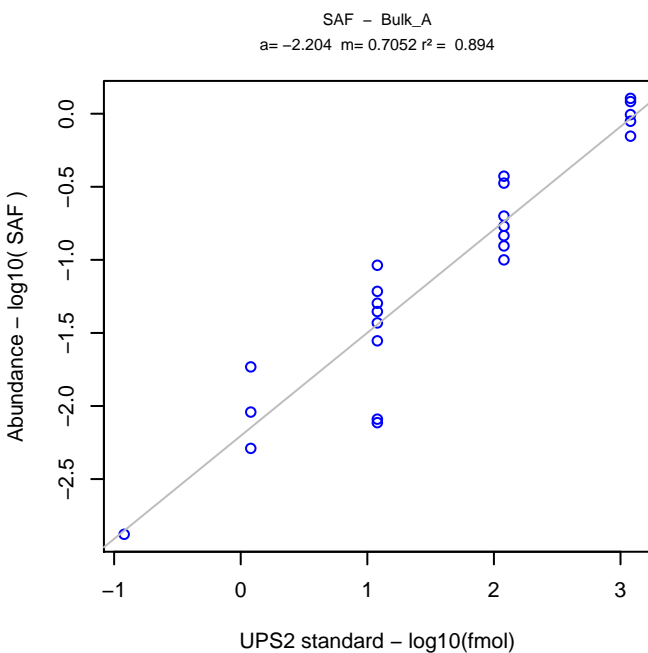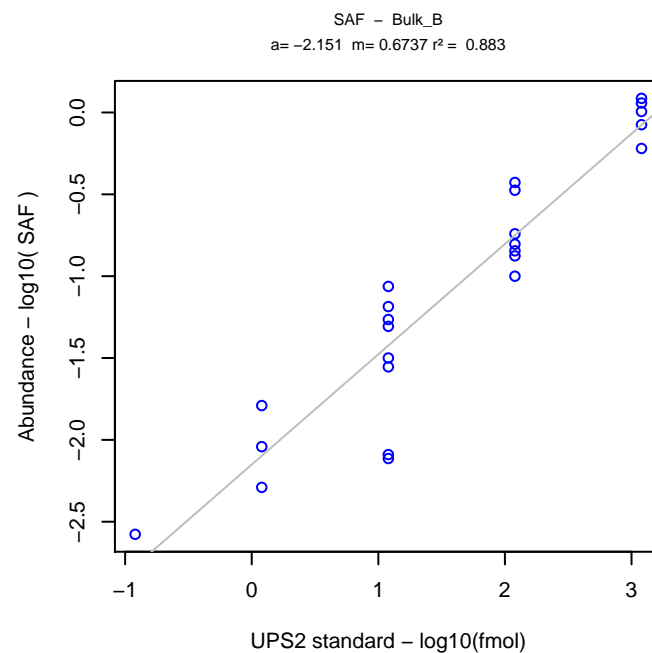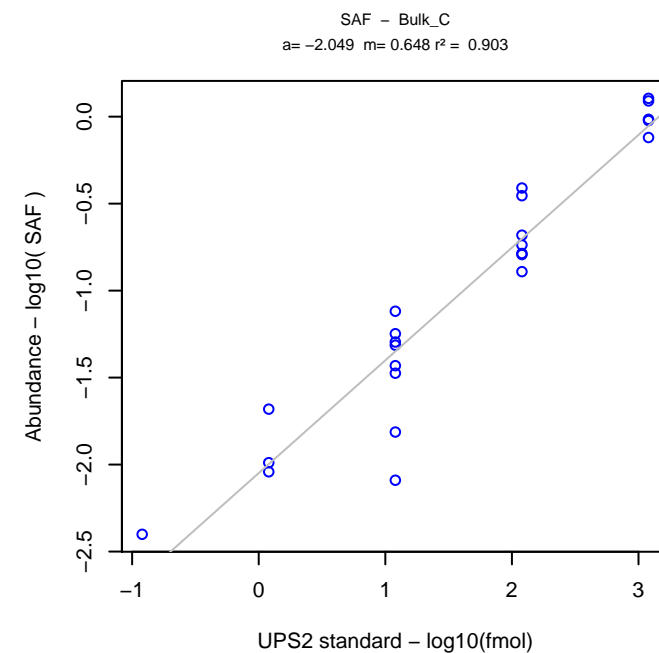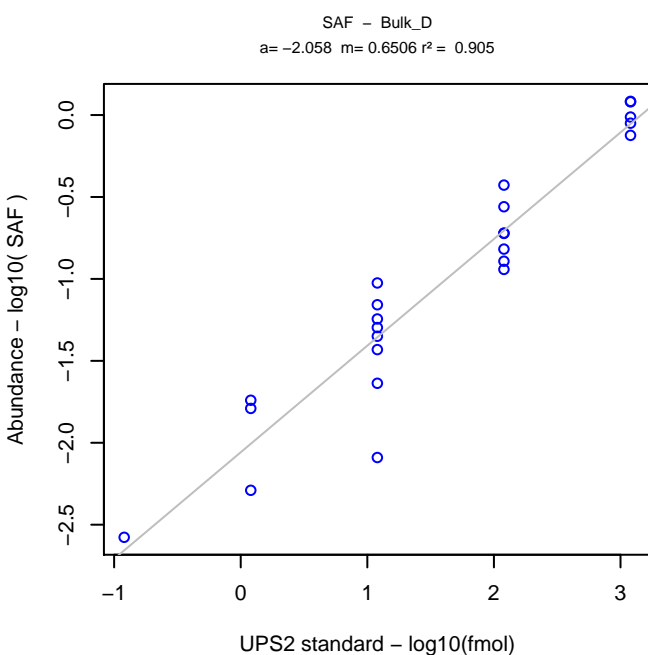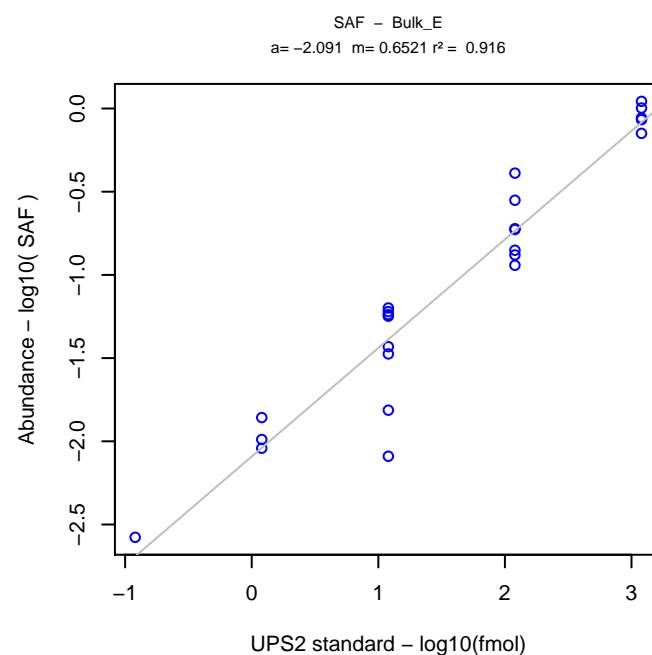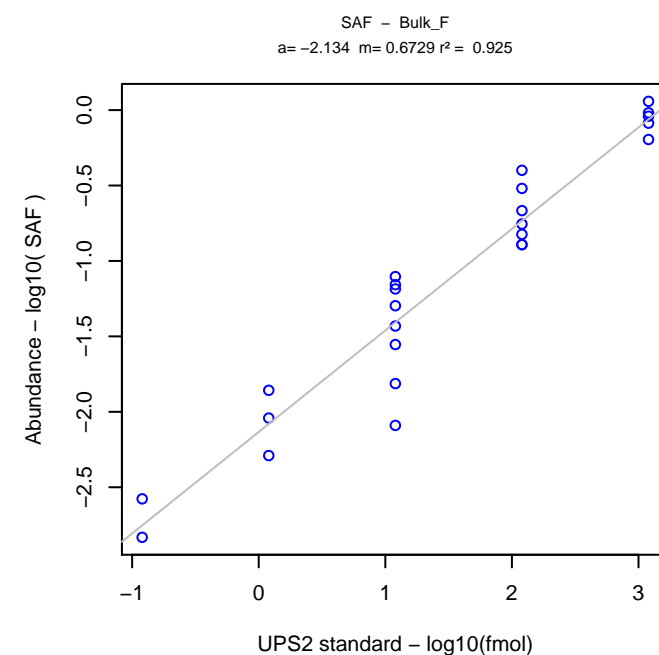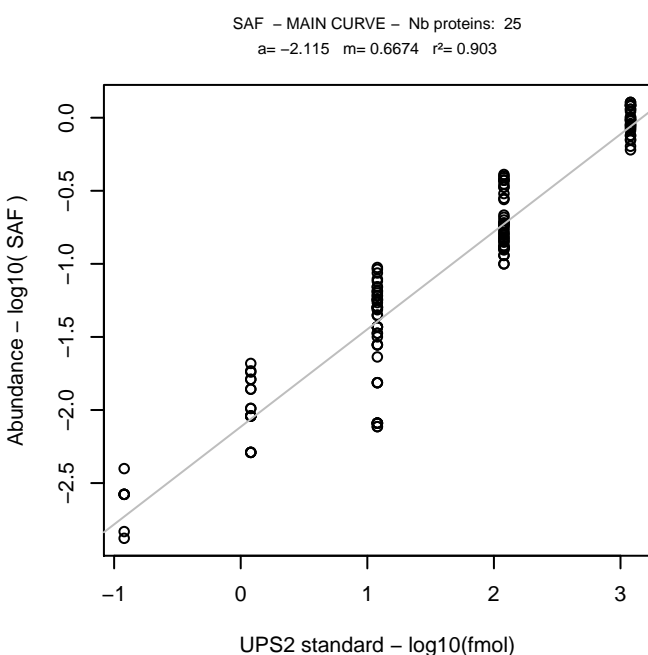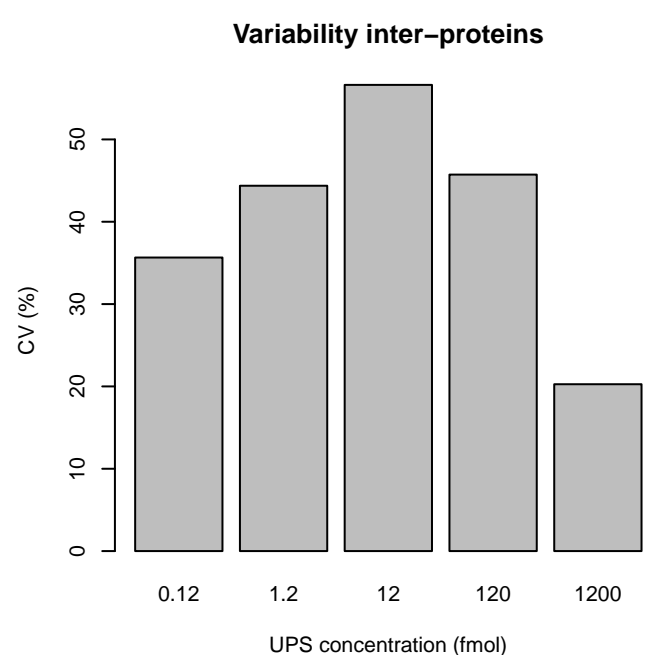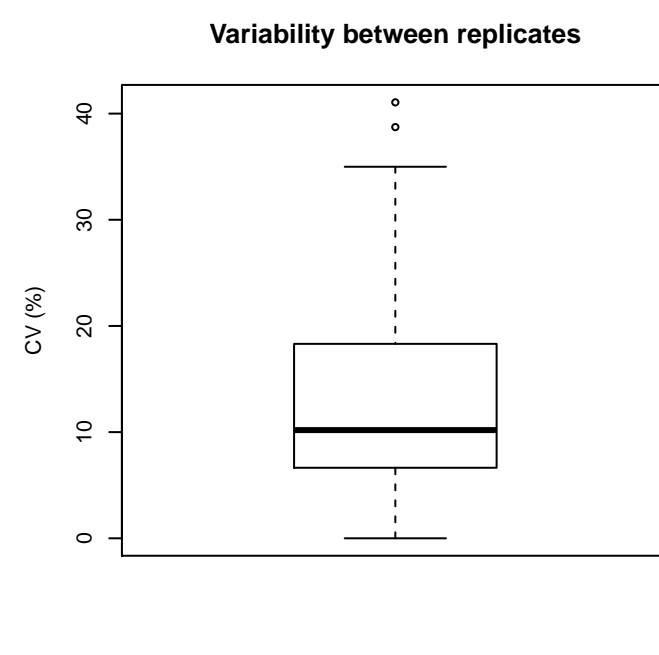

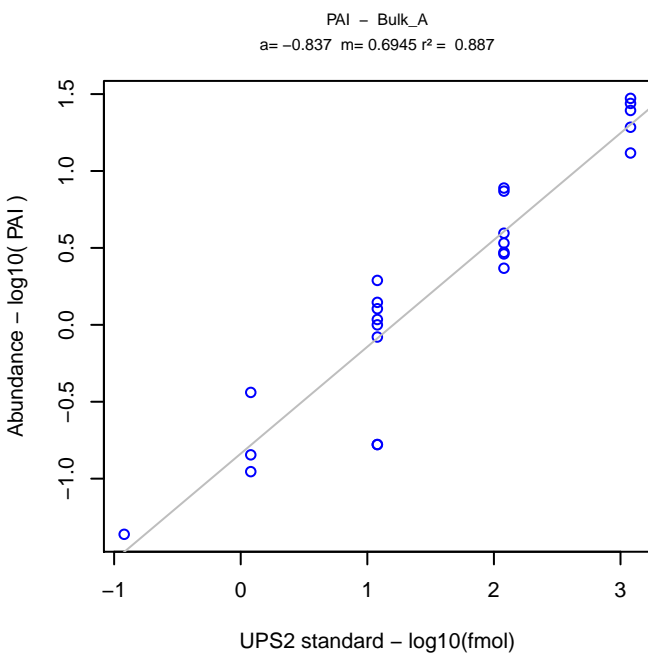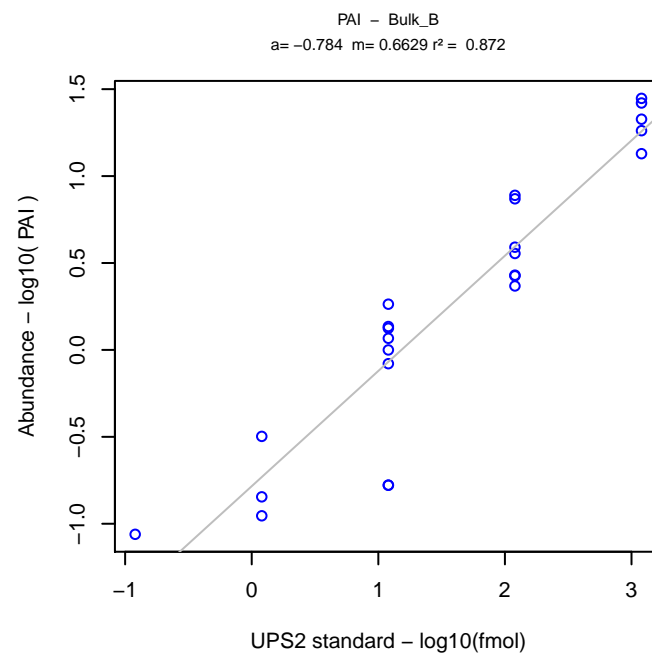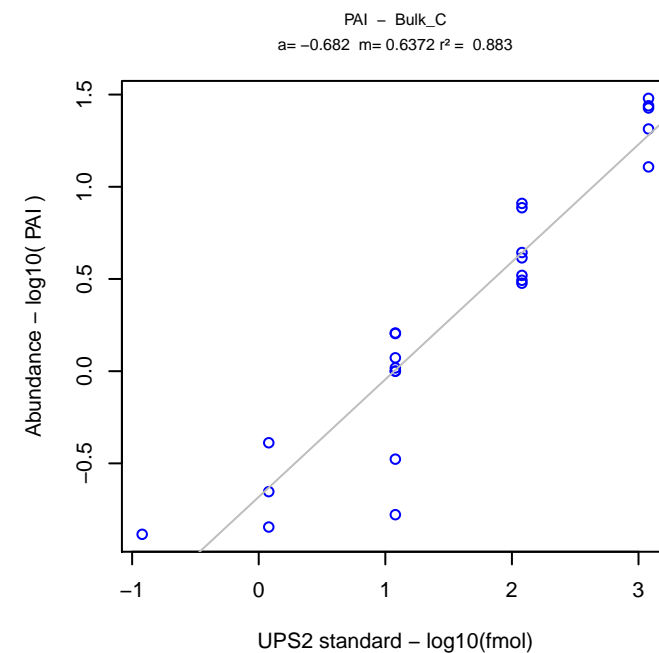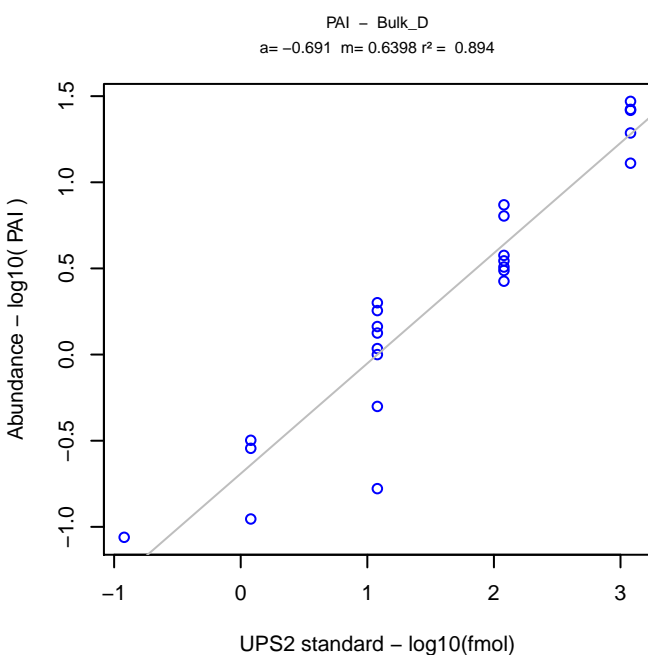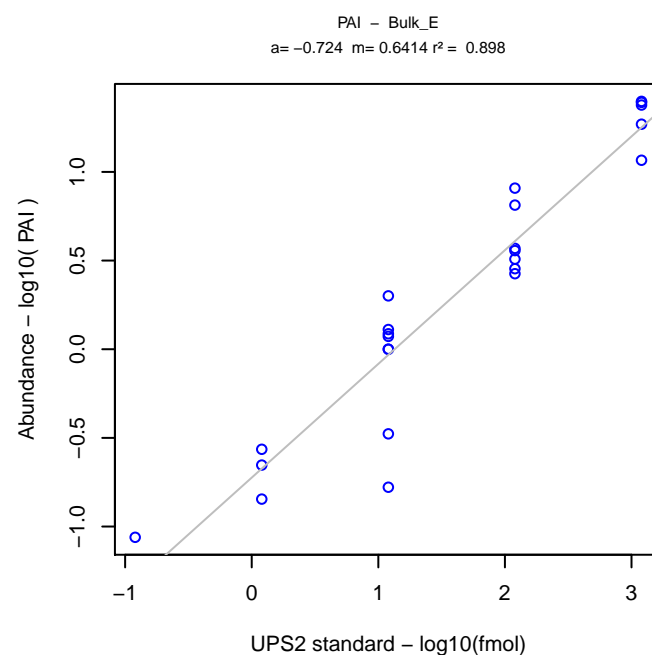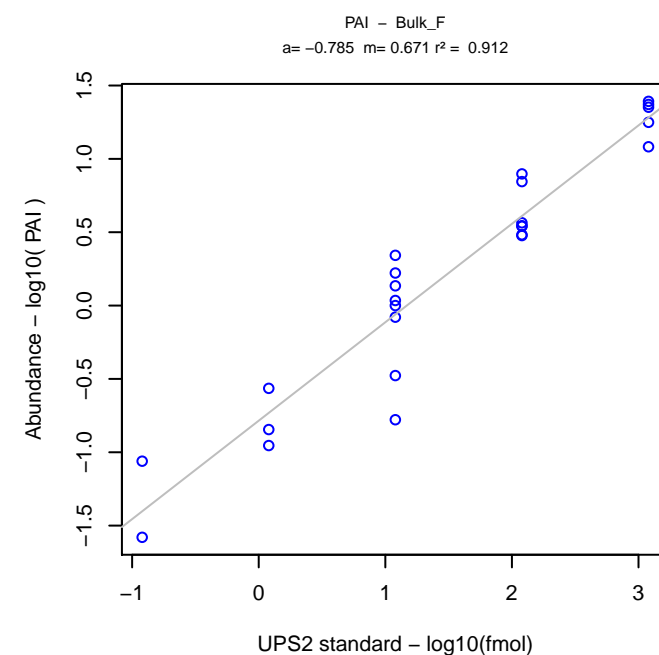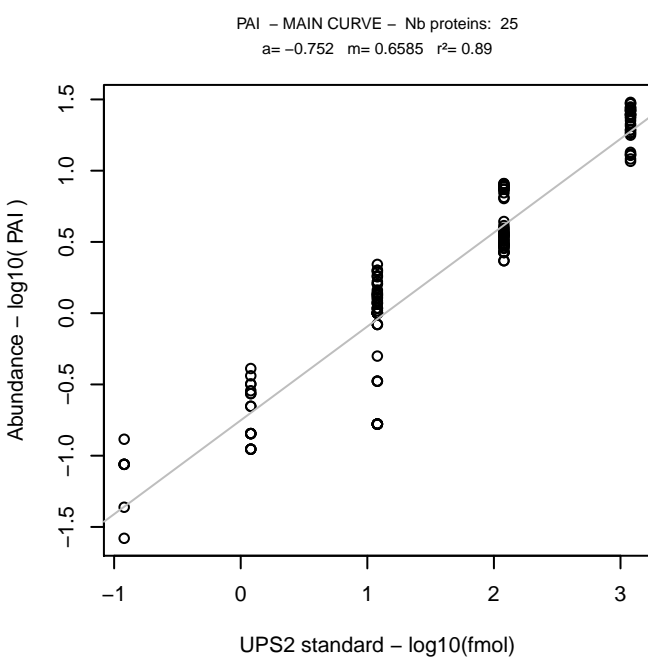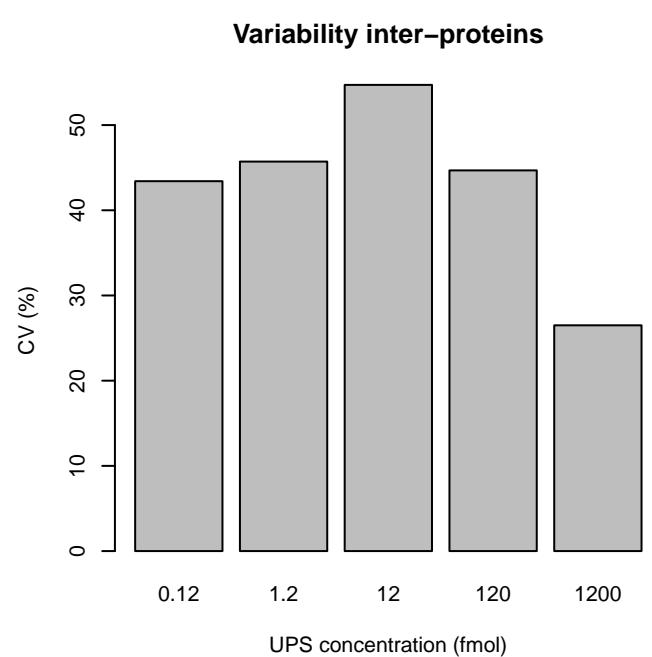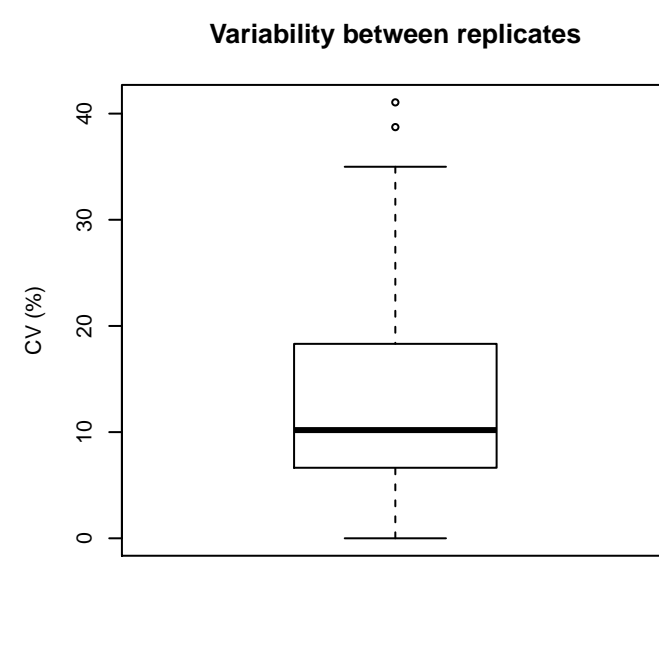

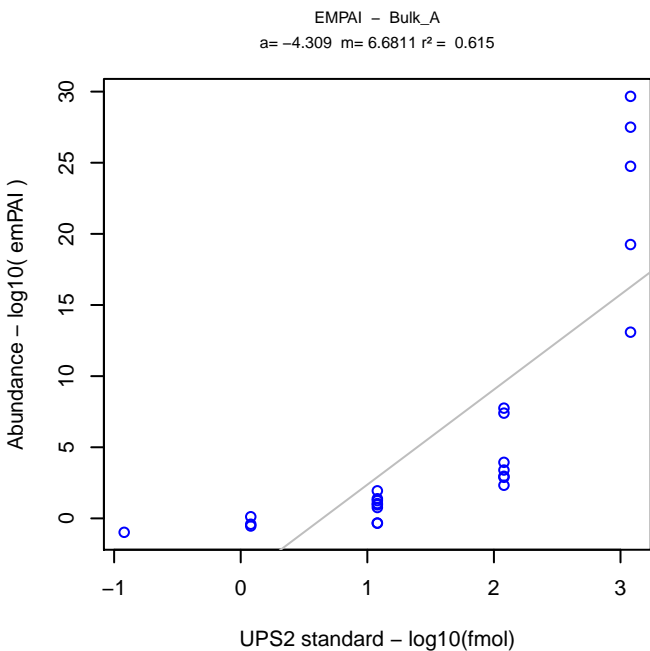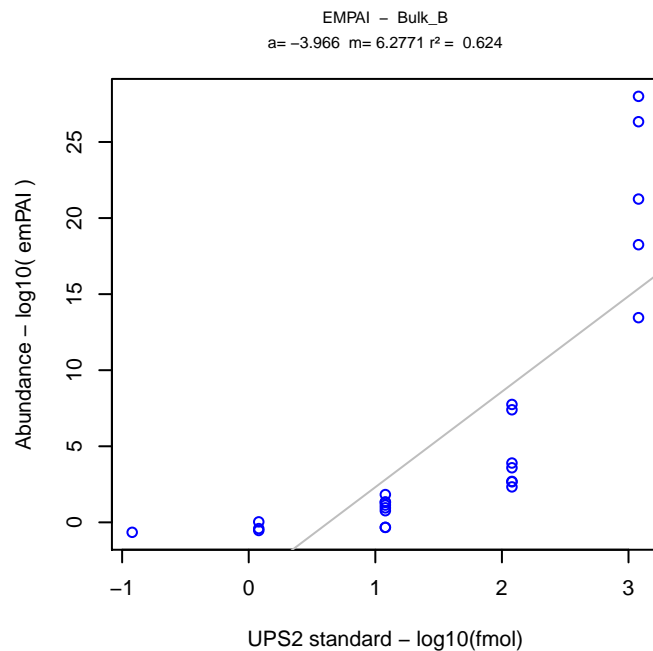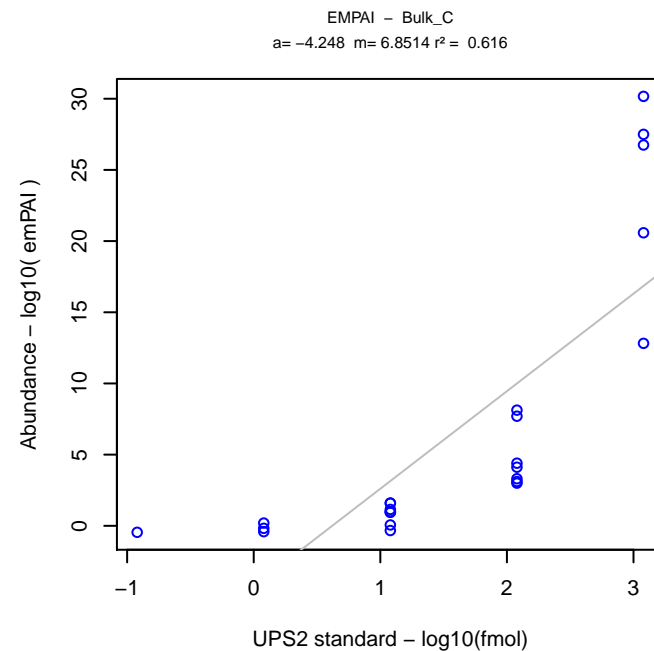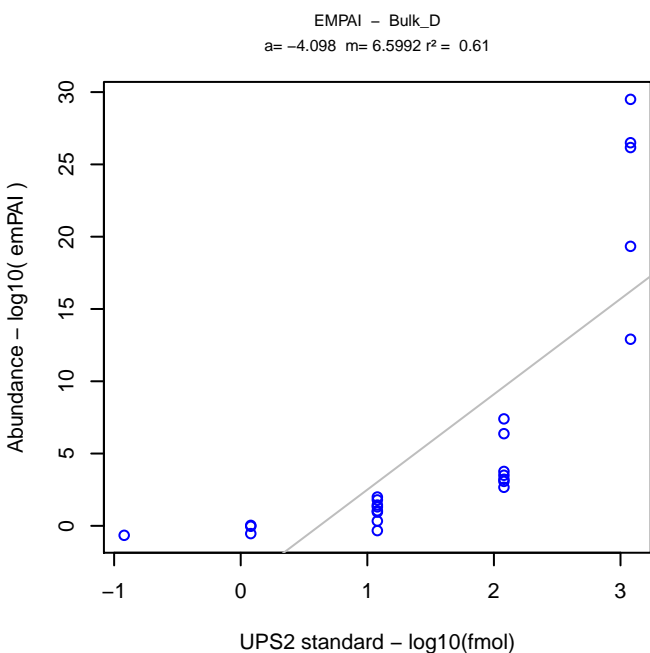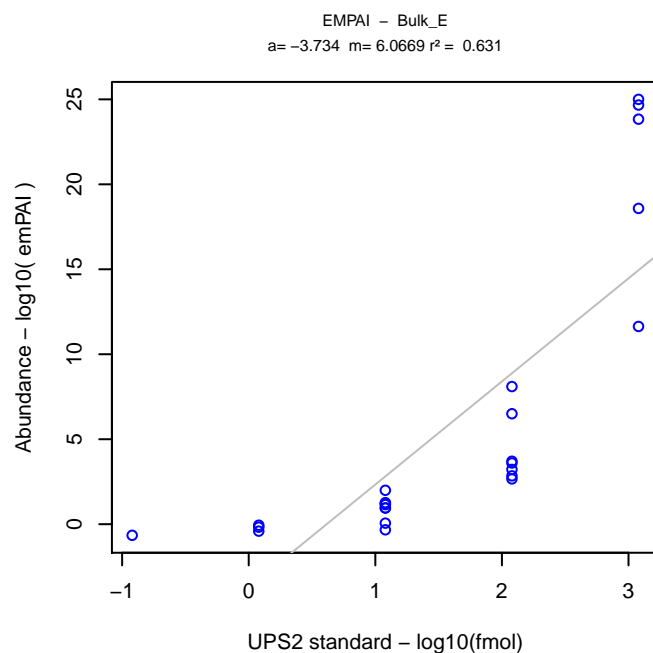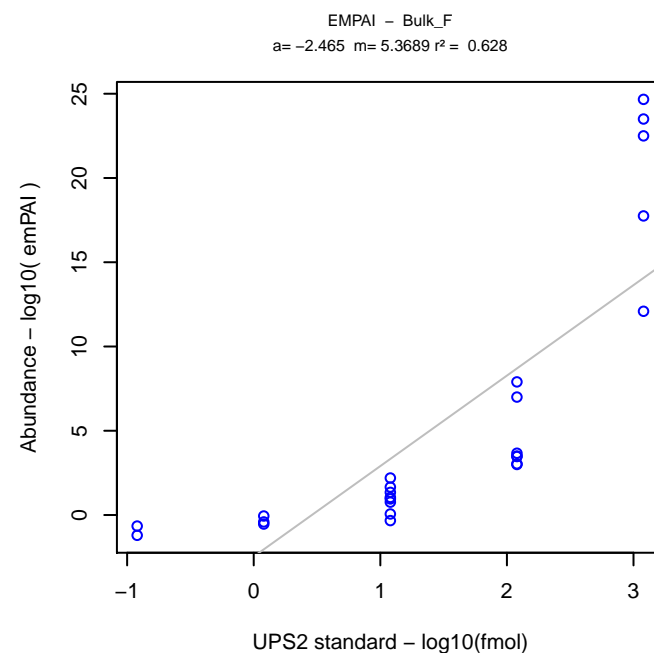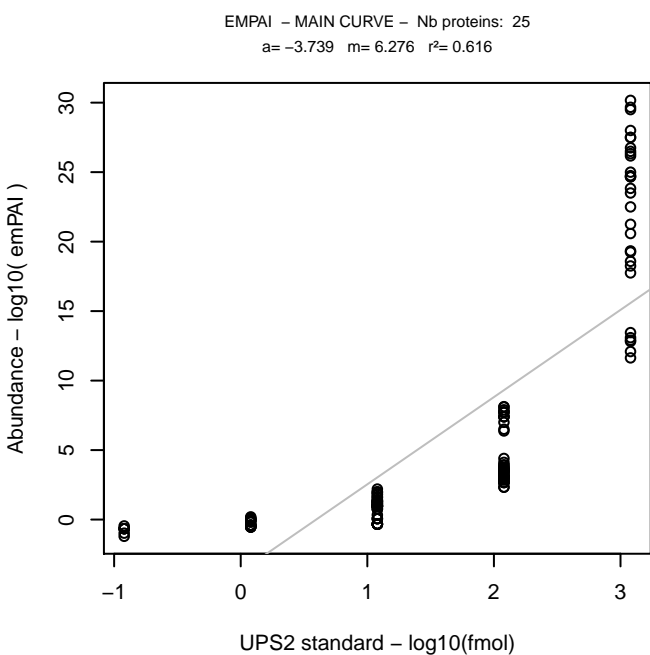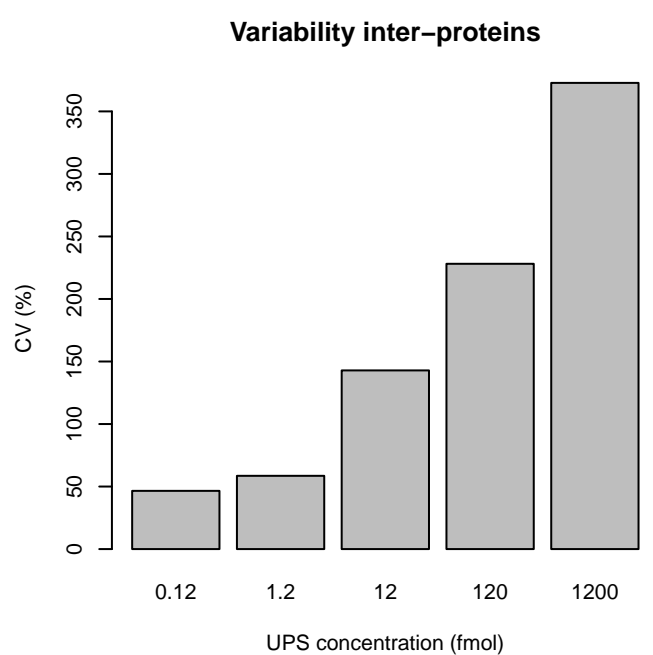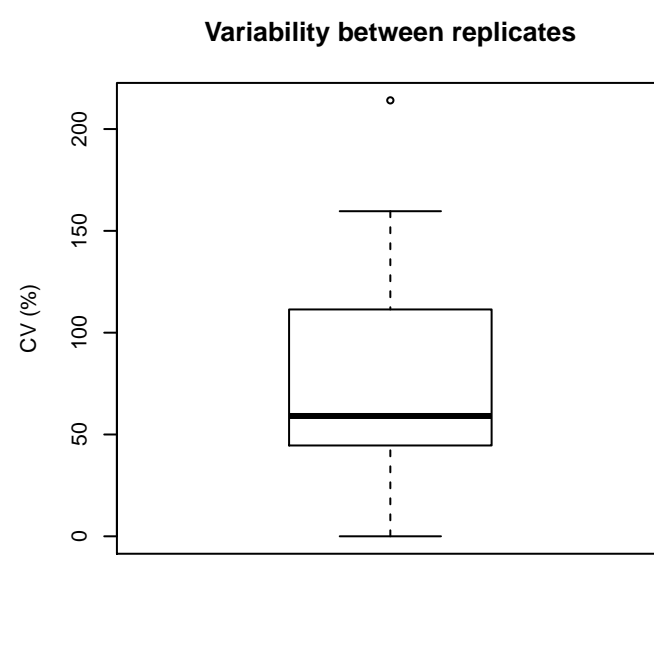

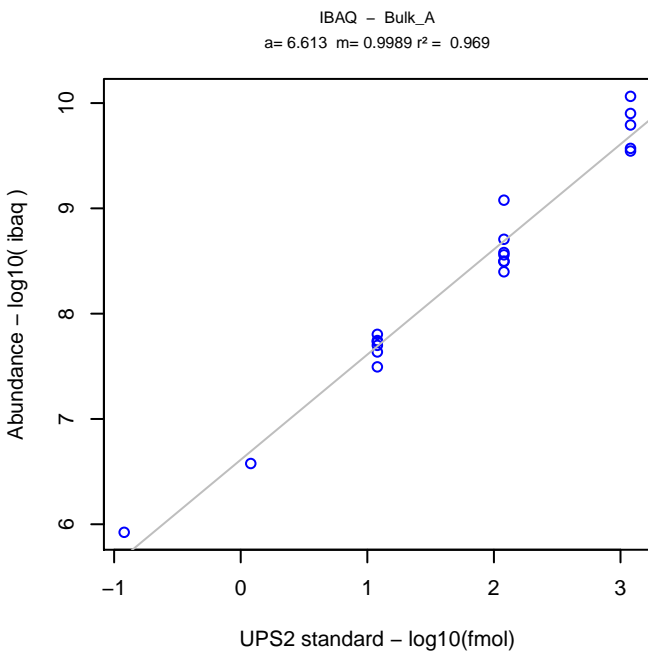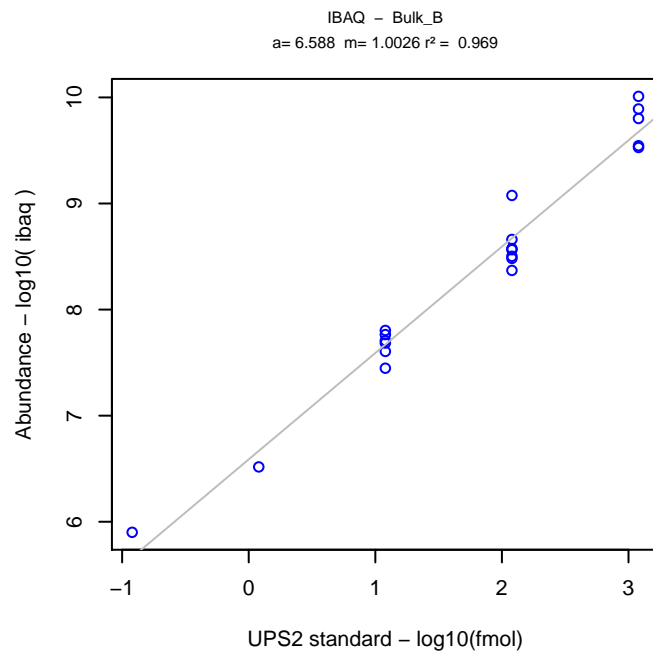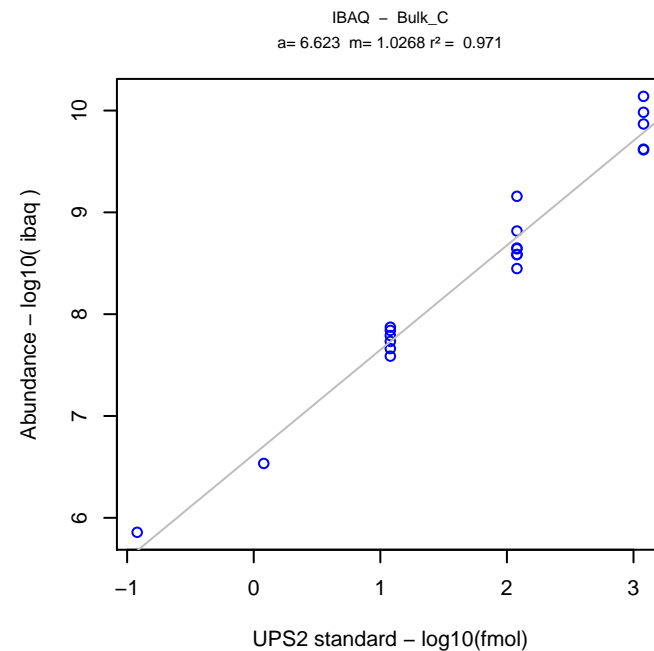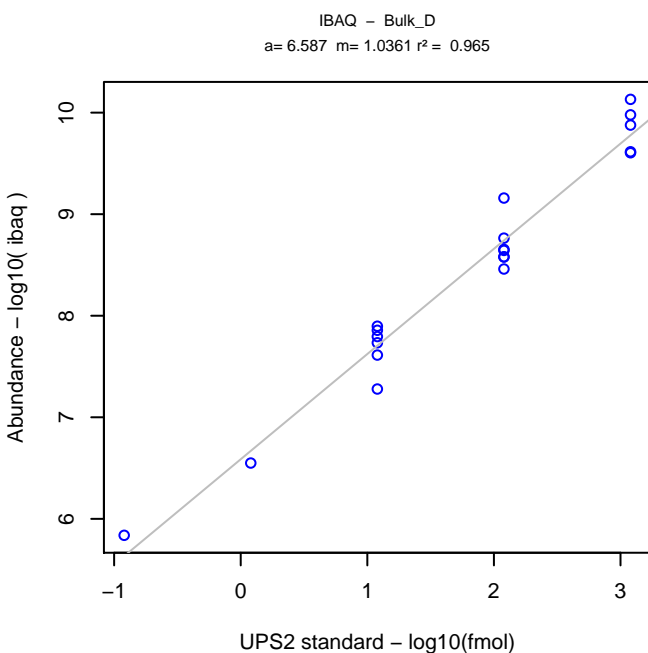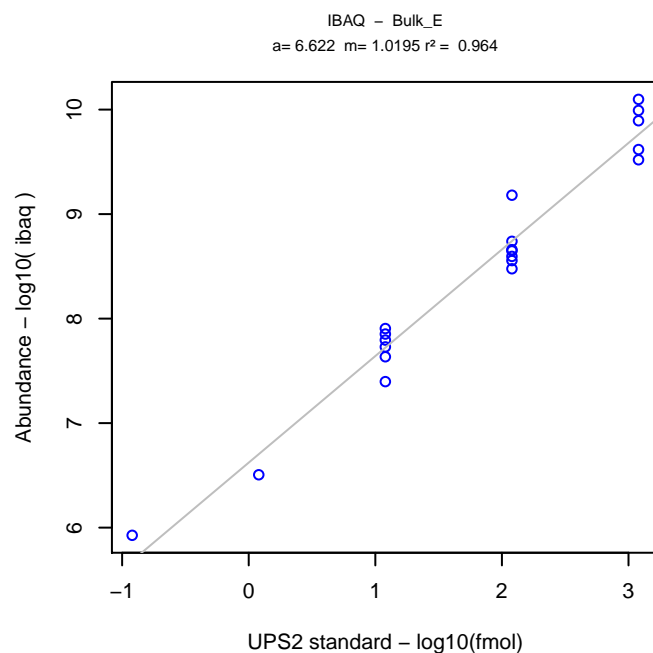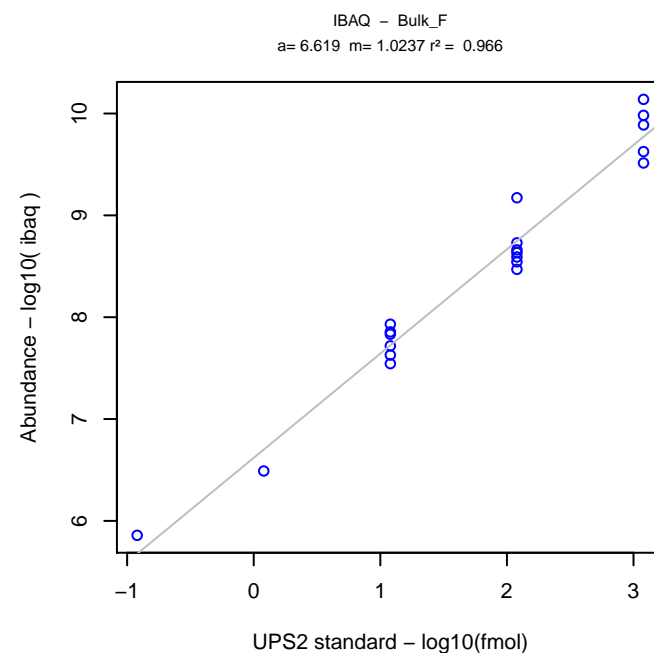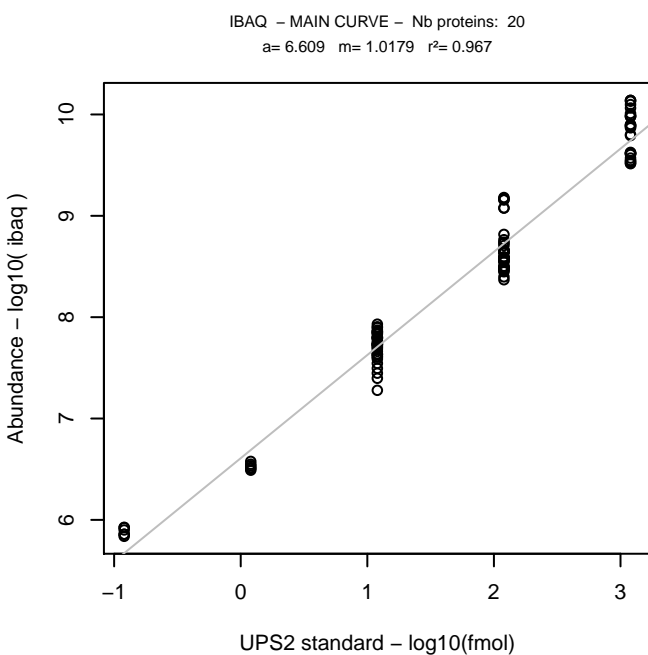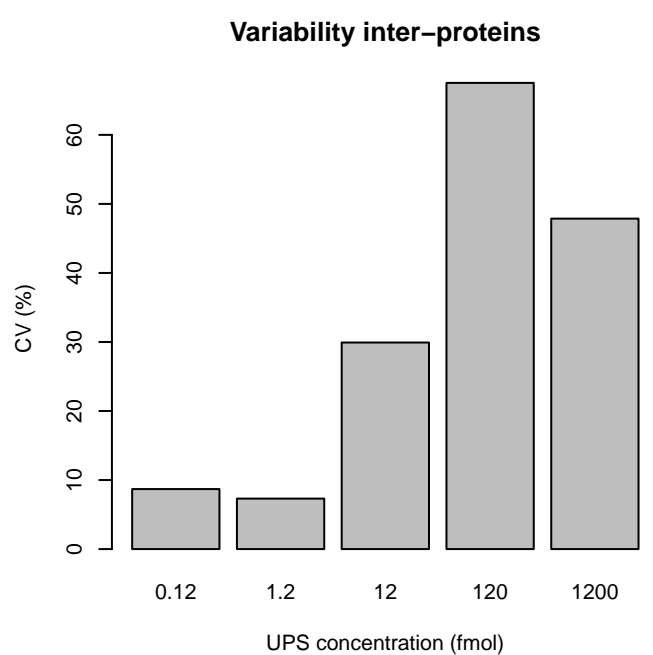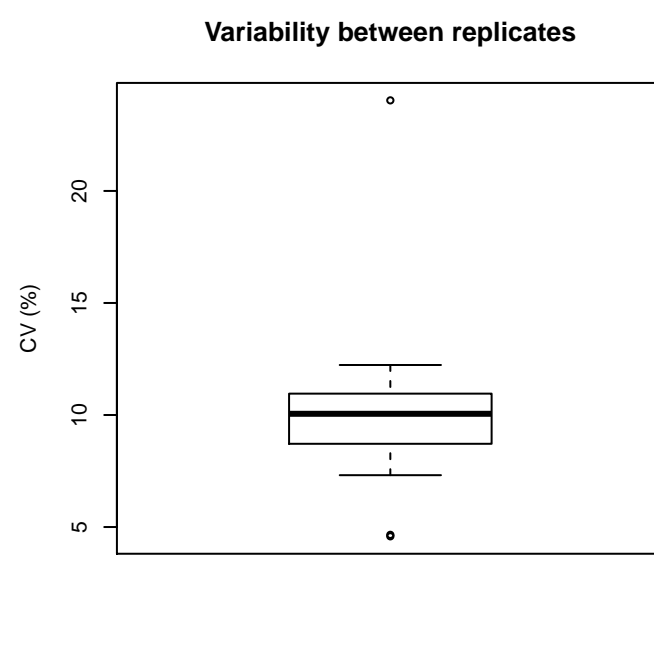

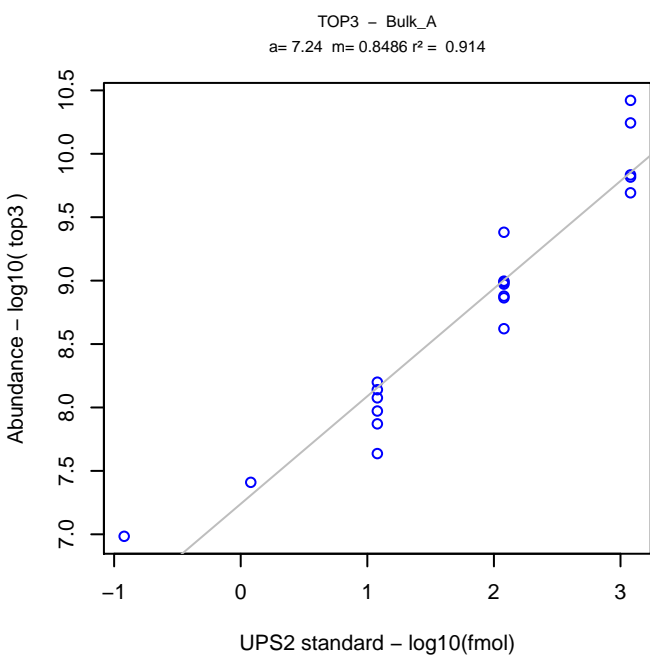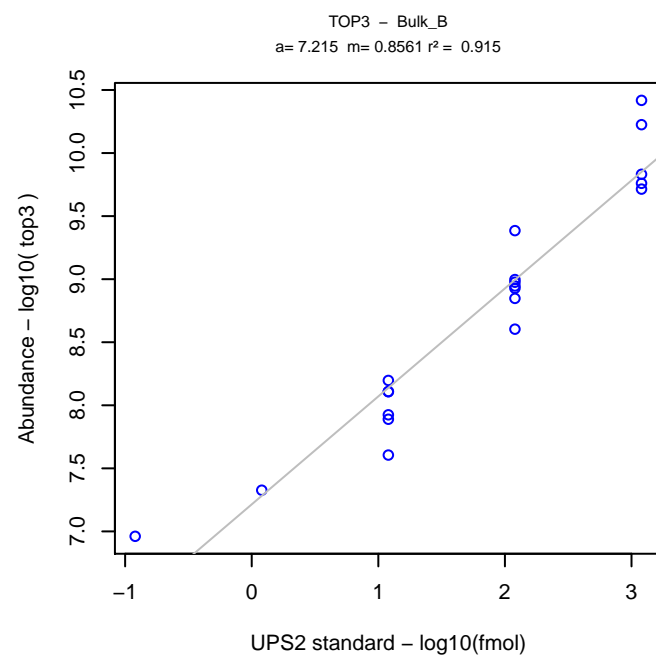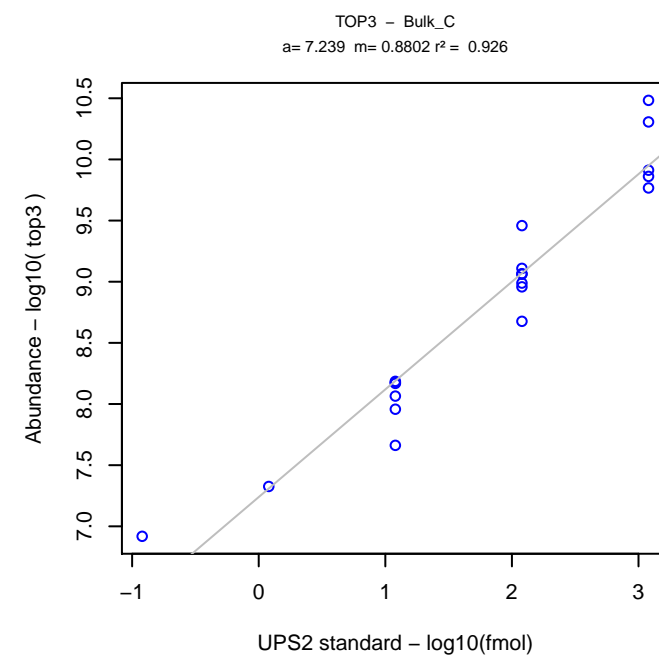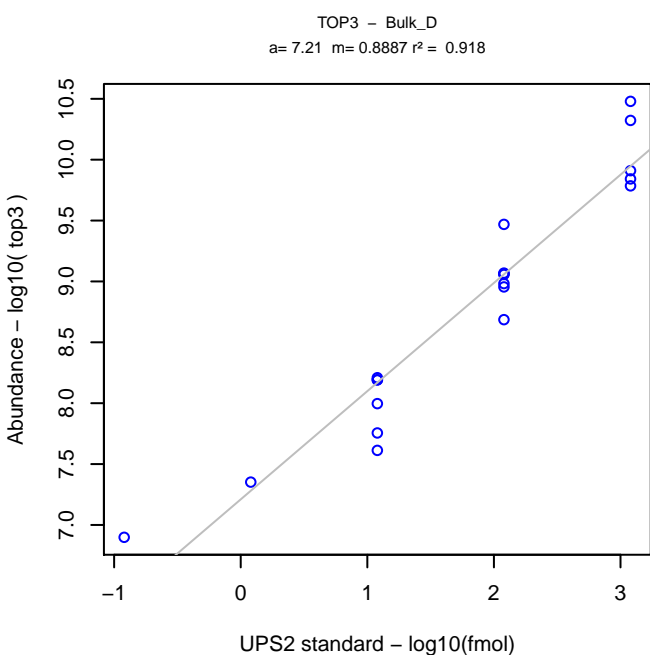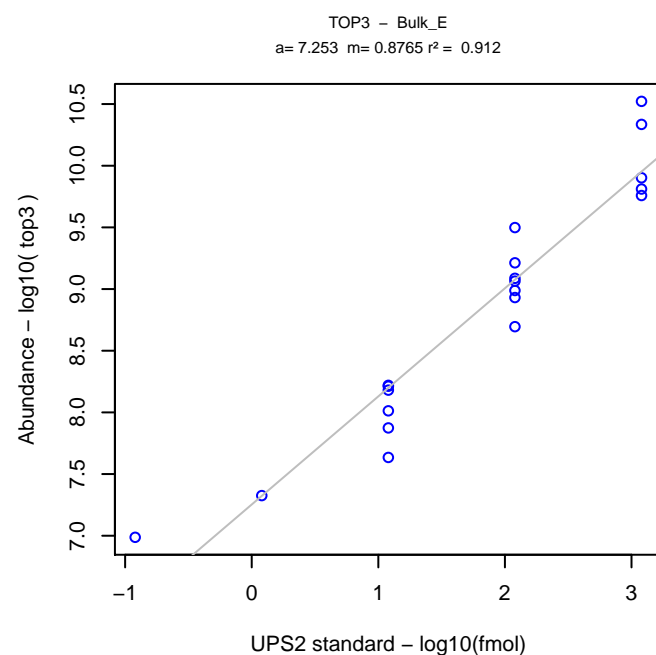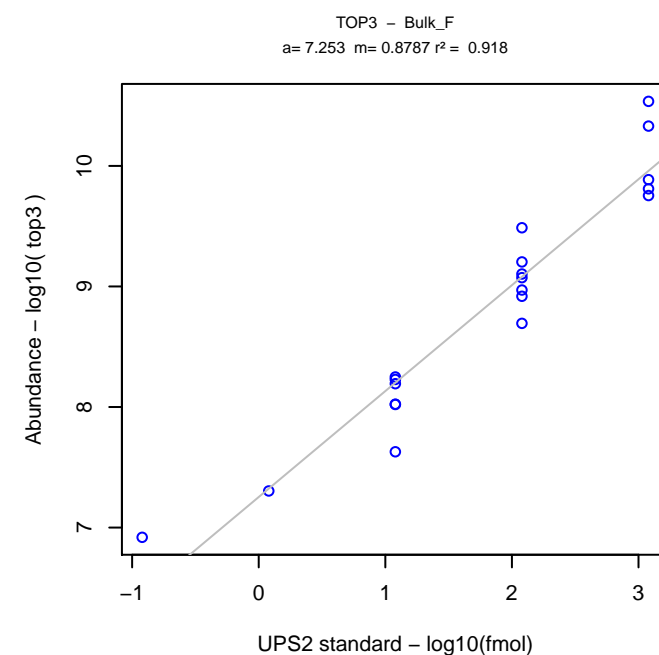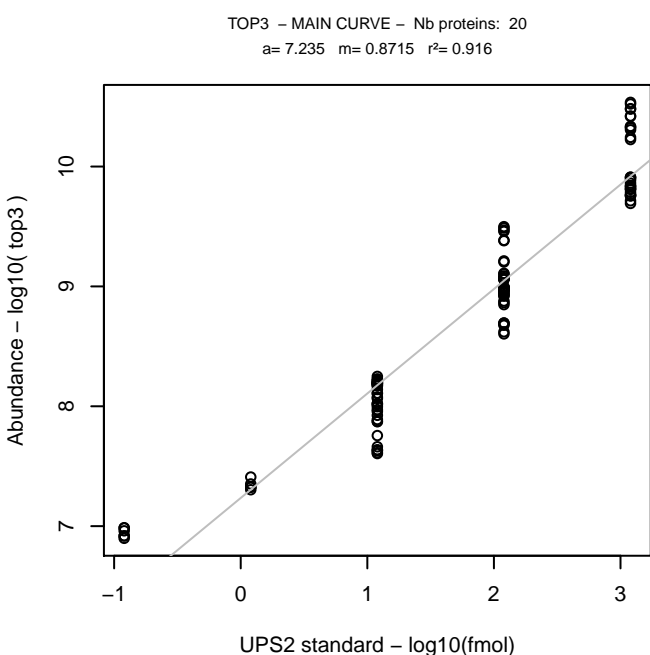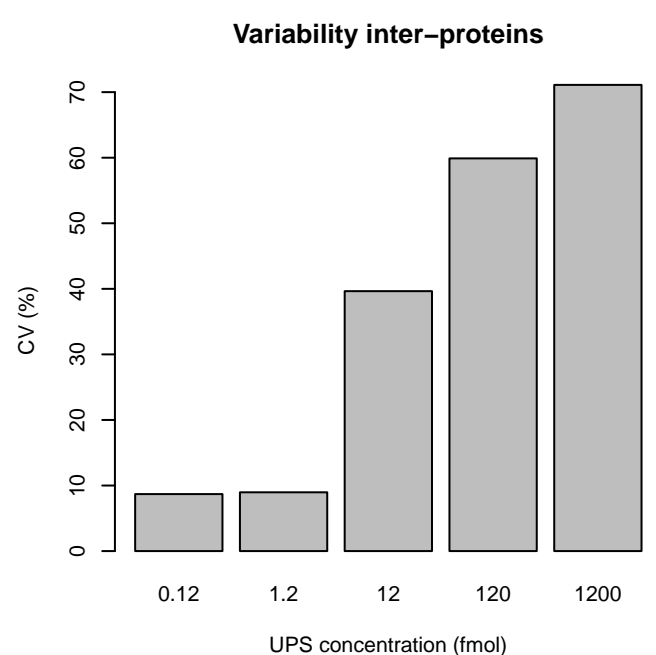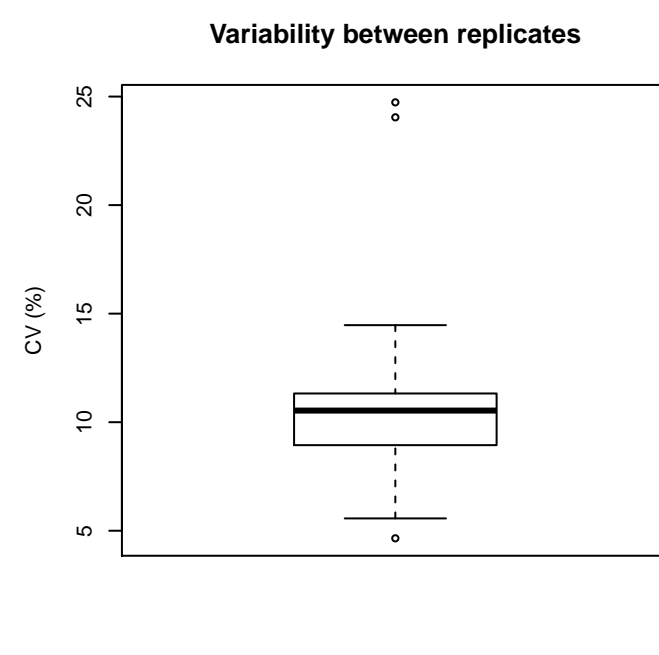

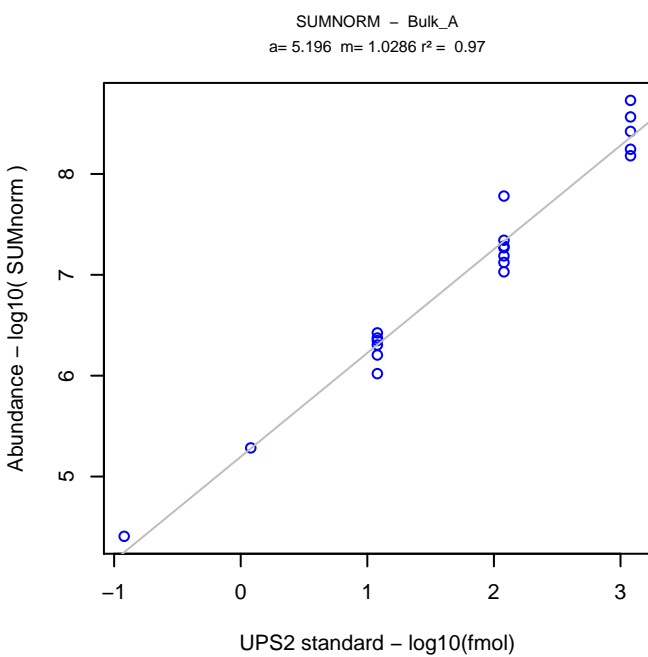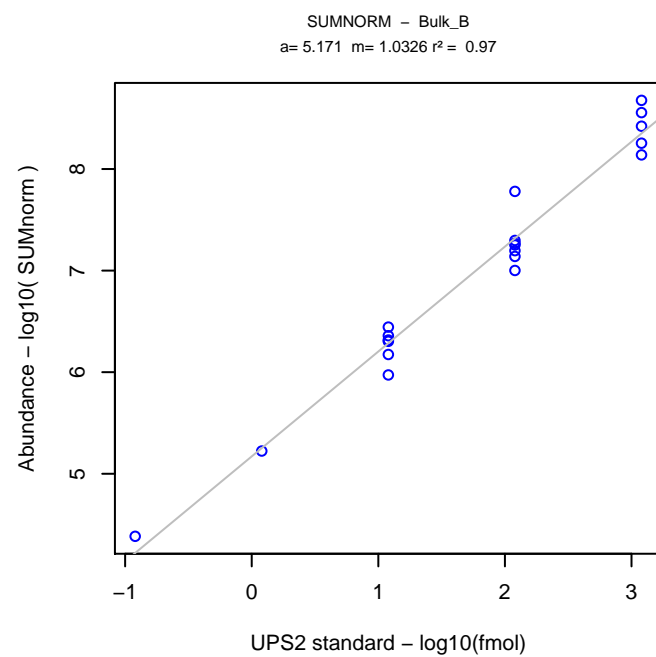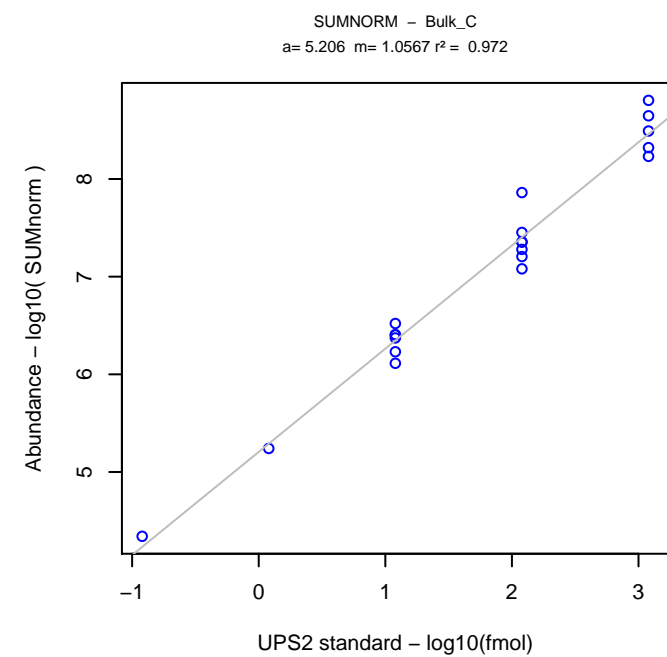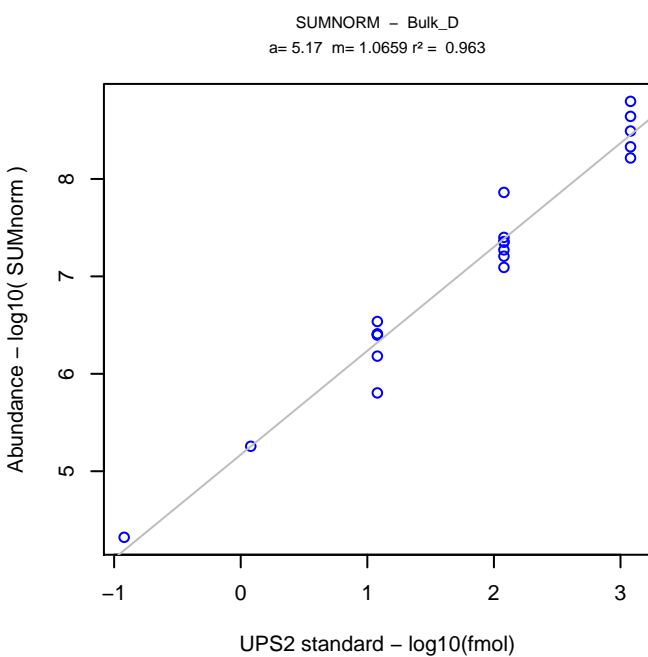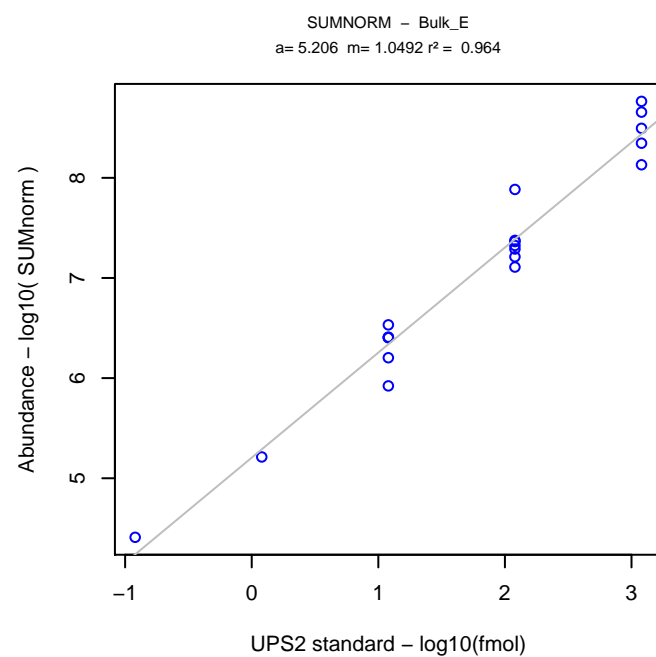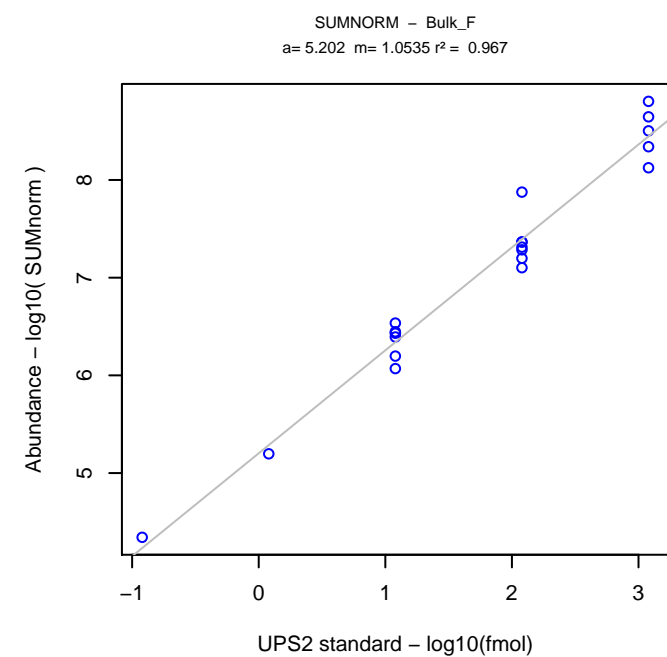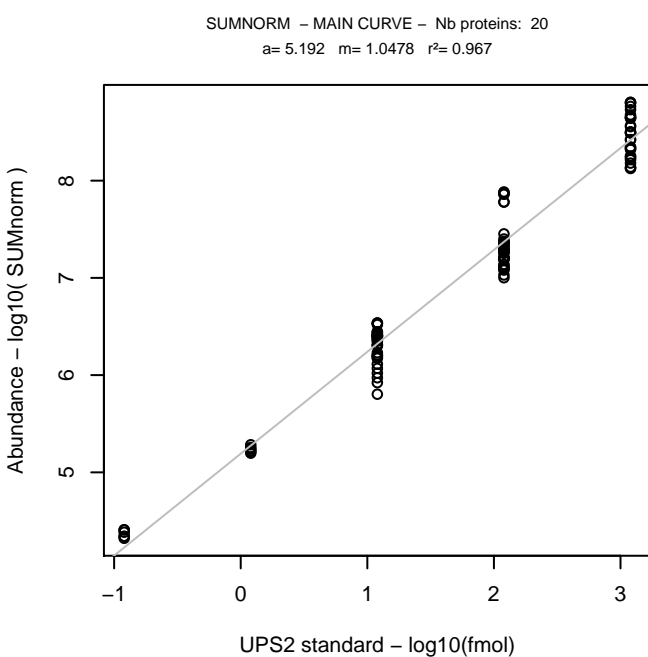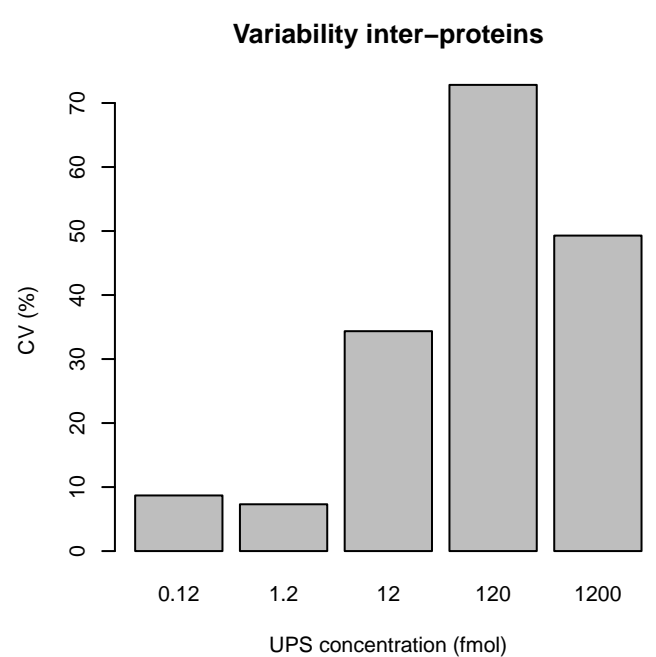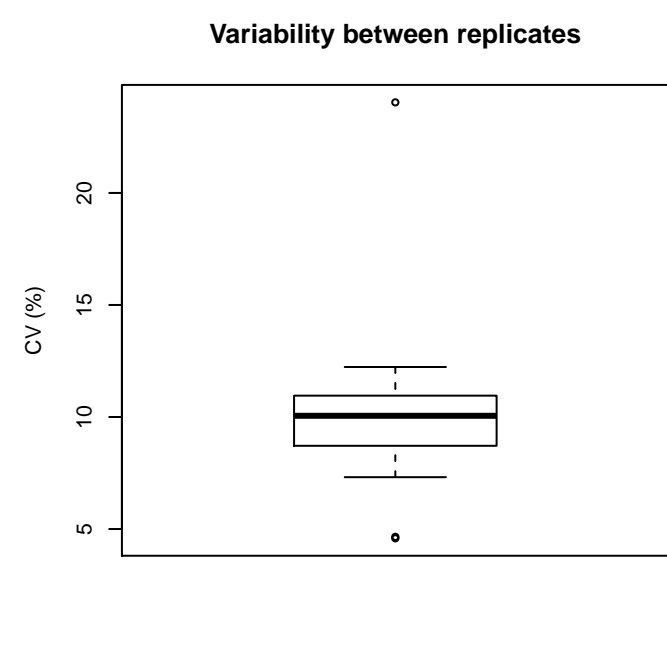

Supplement: s1 [file s1]
